# Supplementary material for: PD-1 cooperates with AIRE-mediated tolerance to prevent lethal autoimmune disease
Source: PubMed Central journal article supplement — Proc Natl Acad Sci U S A. 2022 Apr 8;119(15):e2120149119. doi: 10.1073/pnas.2120149119 (PMC9169857; doi:10.1073/pnas.2120149119), 2022-04-08
Supplement: pnas.2120149119.sapp.pdf [file pnas.2120149119.sapp.pdf]

Supplementary figure 1

**A**

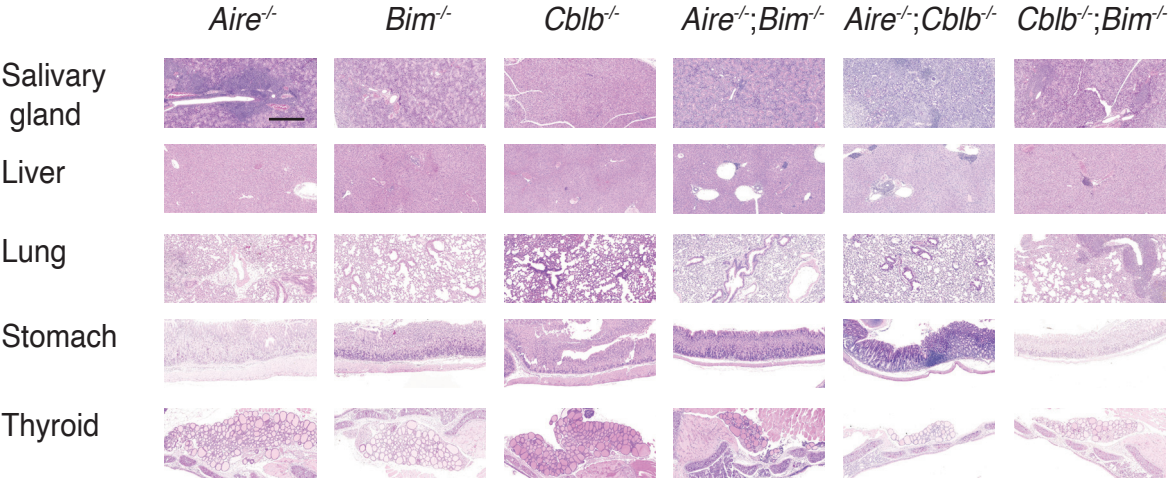

**B**

Scoring

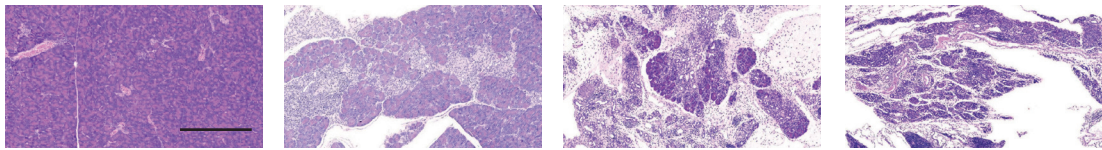

**C**

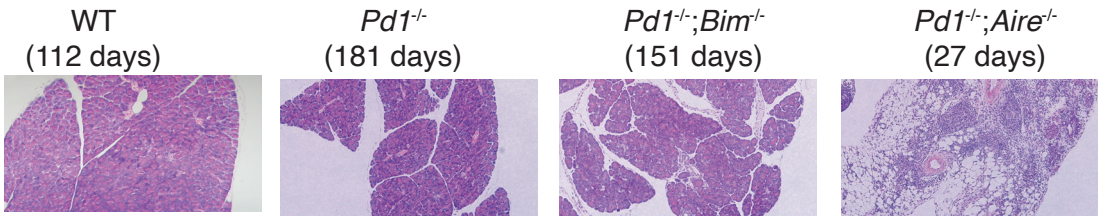

## **Supplementary Figure 1**

### **Autoimmune pathology resulting from combined defects in peripheral and central tolerance mechanisms.**

**a.** Representative images of H&E-stained sections of the salivary gland, liver, lung, stomach and thyroid gland from mice of the indicated genotypes taken at 150 days. Scale bar = 500  $\mu\text{m}$ . **b.** Representative images of H&E stained sections of pancreas showing examples of the scoring system used to quantify lymphocytic infiltration and tissue damage. Sections of pancreas are shown for scores of 0 (no infiltration or damage), 1 (mild lymphocytic infiltration, 50% or less), 2 (florid lymphocytic infiltration over 50% with/without some tissue damage) or 3 (complete tissue destruction). **c.** Representative images of H&E stained sections of pancreas from mice of the indicated genotype and age. Scale bar = 500  $\mu\text{m}$ .

## Supplementary figure 2

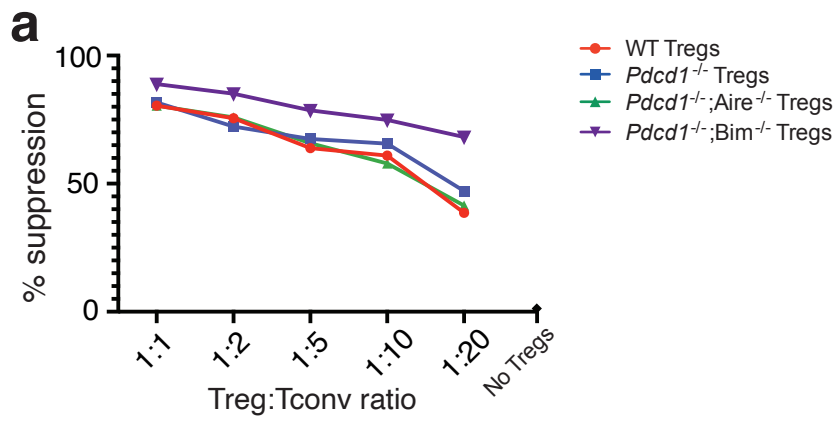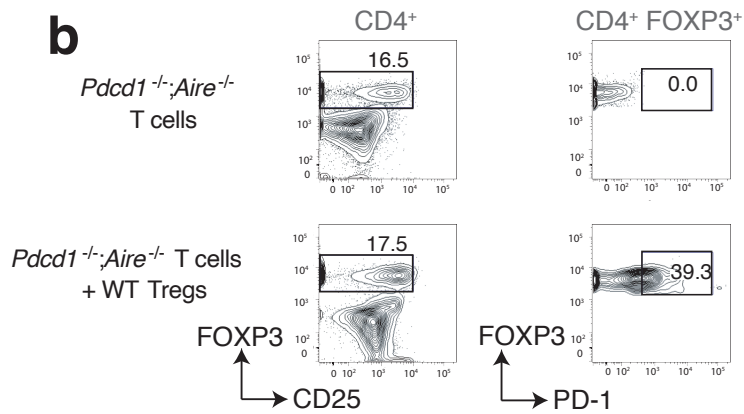

**c** WT:*Pdc1*<sup>-/-</sup> → *Aire*<sup>-/-</sup>

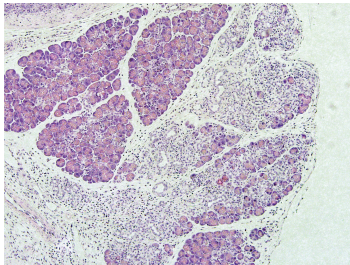

**Supplementary Figure 2. Treg cell function in *Pdcd1*<sup>-/-</sup>;*Aire*<sup>-/-</sup> mice.** **a.** Purified CD4<sup>+</sup> CD24<sup>+</sup> Treg cells from the indicated genotypes were co-cultured with CTV-labeled, activated CD4<sup>+</sup> CD25<sup>-</sup> conventional T cells from WT mice. The percentage suppression was plotted across a range of Treg:Tconv ratios. **b.** Representative contour plots of FOXP3 versus CD25 (gated on CD4<sup>+</sup> splenocytes) and FOXP3 vs PD-1 (gated on CD4<sup>+</sup>FOXP3<sup>+</sup> splenocytes) from *Rag1*<sup>-/-</sup> mice adoptively transferred with T cells from *Pdcd1*<sup>-/-</sup>;*Aire*<sup>-/-</sup> mice with or without co-administration of CD4<sup>+</sup>Foxp3<sup>+</sup> Treg cells from WT mice. **c.** Representative image of H&E-stained section of pancreas from *Aire*<sup>-/-</sup> haematopoietic chimera reconstituted with 50:50 WT:*Pdcd1*<sup>-/-</sup> bone marrow cells.

# Supplementary figure 3

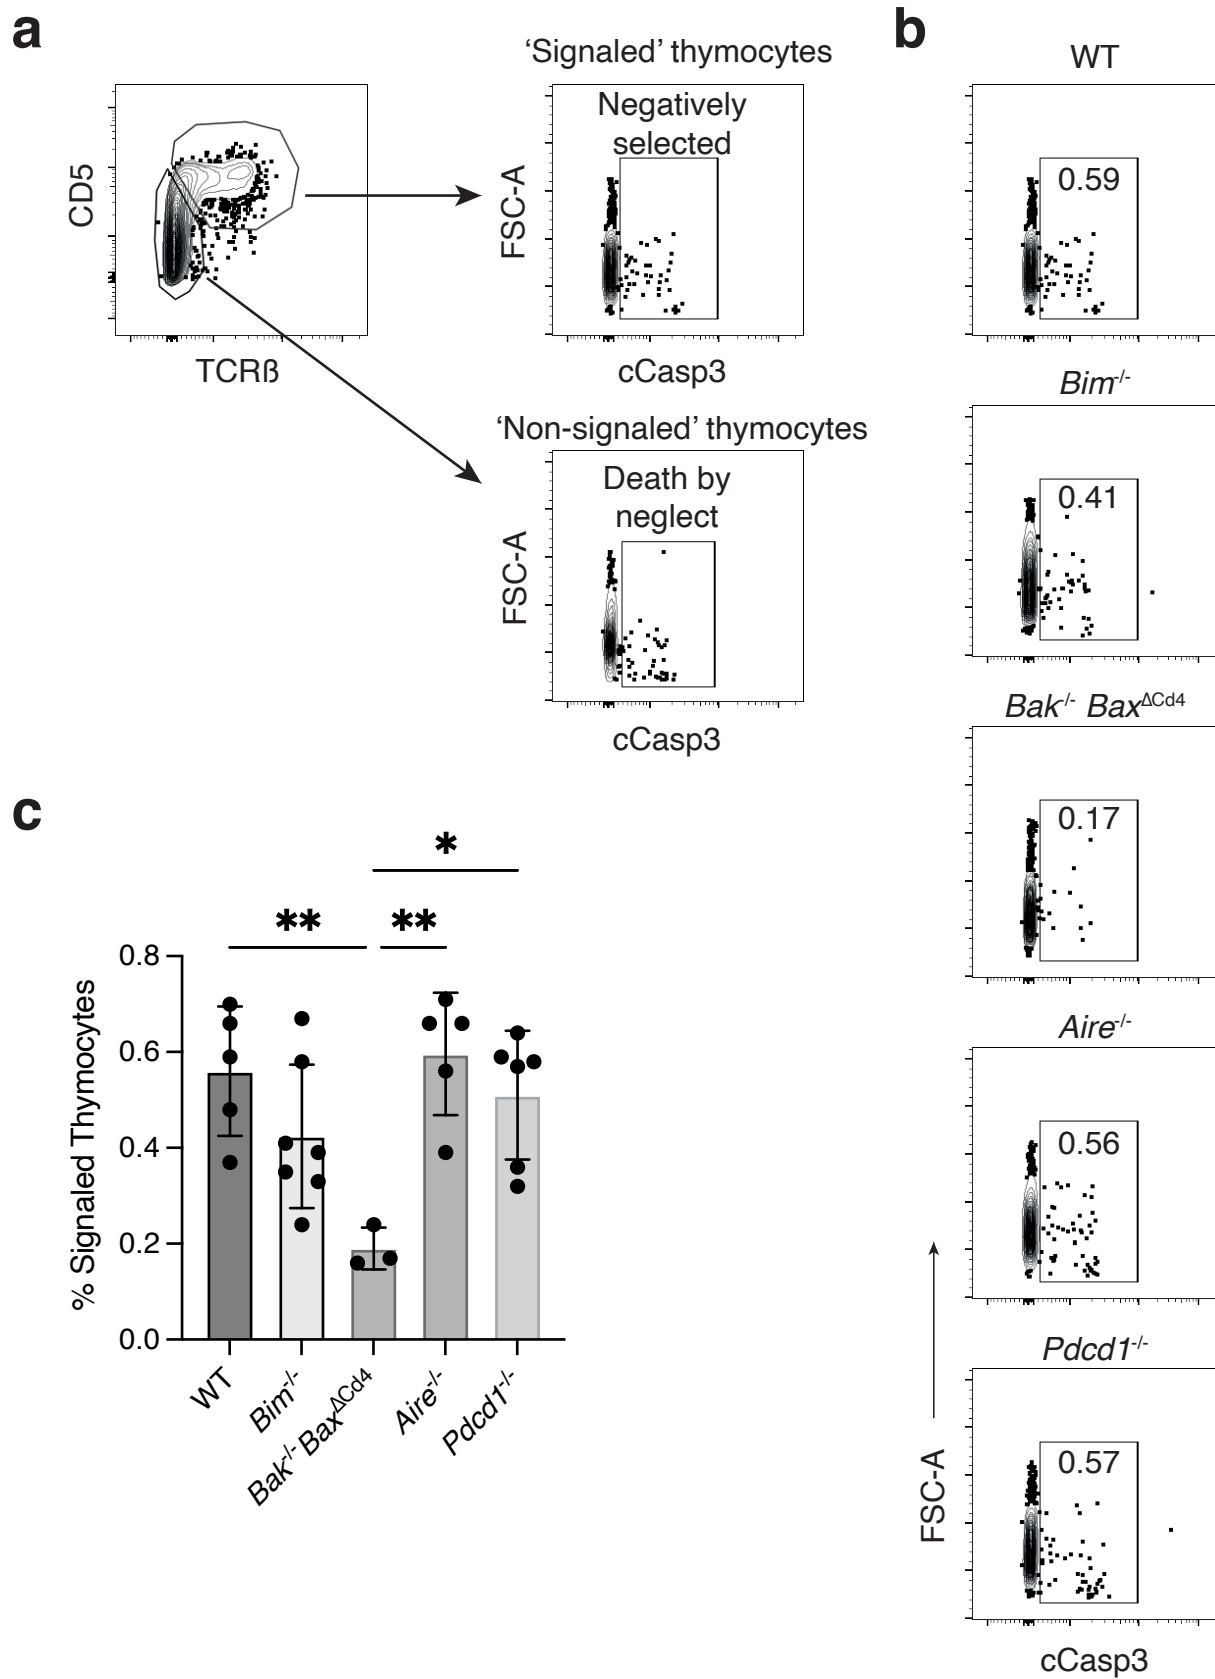

**Supplementary Figure 3. Quantification of thymocyte deletion.** **a.** Flow cytometry gating strategy for the identification of thymocytes undergoing clonal deletion or death by neglect by active (cleaved) caspase 3 expression. ‘Signalled’ and ‘non-signalled’ cells were distinguished on the basis of CD5 and TCR $\beta$  expression following the exclusion of CD25<sup>+</sup>, CD19<sup>+</sup>, NK1.1<sup>+</sup> and TCR $\gamma\delta$ <sup>+</sup> cells. **b.** Representative contour plots of cells undergoing clonal deletion based on active Caspase 3 expression in signalled (CD5<sup>+</sup> TCR $\beta$ <sup>+</sup>) thymocytes from WT, *Bim*<sup>-/-</sup>, *Bak*<sup>-/-</sup> *Bax* <sup>$\Delta$ Cd4</sup>, *Aire*<sup>-/-</sup> and *Pdcd1*<sup>-/-</sup> mice. Numbers indicate the percentage of active Caspase 3<sup>+</sup> cells within the gate. **c.** Quantification of the percentages of active Caspase 3<sup>+</sup> ‘signalled’ thymocytes from WT, *Bim*<sup>-/-</sup>, *Bak*<sup>-/-</sup> *Bax* <sup>$\Delta$ Cd4</sup>, *Aire*<sup>-/-</sup> and *Pdcd1*<sup>-/-</sup> mice. Plots in **b.** are representative of two independent experiments, totalling *n*=3-7 mice/genotype. Data in **c.** is presented as mean  $\pm$  s.d. \* and \*\* denotes *p*<0.05 and *p*<0.01, respectively, by one-way ANOVA with multiple comparisons test.

## **Supplementary Methods**

### **Flow cytometry**

Dissected lymphoid organs were collected in RPMI medium with 25.96 mM HEPES, mashed between frosted glass slides and filtered through 100  $\mu$ M mesh. Cells ( $3 \times 10^6$ ) were stained with antibody conjugates to detect cell surface proteins for 15 min at 4°C. Cells were then washed in FACS buffer and resuspended in a final volume of 200  $\mu$ L of FACS buffer containing Propidium Iodide at a final concentration of 2.5  $\mu$ g/mL prior to acquiring the data to enable exclusion of dead cells.

Intra-cellular staining was performed with the FOXP3 staining kit (Invitrogen eBiosciences, California). Cell pellets were resuspended in 100  $\mu$ L of fixation/permeabilization diluent solution (1:4) for 1 h at 4°C and cells were then stained with antibodies for 30 min at 4°C. Cells were washed with permeabilization solution and then resuspended in 100  $\mu$ L FACS buffer. The stained cells were acquired on a Fortessa flow cytometer (BD Biosciences), calibrated with single-color stains for electronic compensation of spectral overlap between fluorochromes. Data were analyzed using Flowjo software (TreeStar).

### **Antibodies and immunoconjugates**

Surface labeling of lymphocyte populations was performed using the following antibodies that were made in the WEHI Monoclonal Antibody Facility, unless otherwise stated: unconjugated anti-mouse CD16/32 Fc $\gamma$ R block, anti-CD4 PerCP/Cy5.5 (clone 30-F11, Biolegend, California), anti-CD8 APC/Cy7 or BV650 (clone 53-6.7, Biolegend, California), anti-TCR $\beta$  PE-CY7 (clone H57.59.1, Biolegend) or anti-TCR $\beta$  BUV395 (clone H57.59.1, BD Biosciences, California), anti-CD25 BV510 (clone PC61, Biolegend, California) or anti-CD25 FITC (clone PC61), anti-CD44 FITC (clone IM781) or anti-CD44 Alexa Fluor 700 (clone 1M7, Biolegend, California), anti-CD19 FITC (clone 1D3), anti-CD62L APC/Cy7 (clone MEL-14, Biolegend, California), anti-NK1.1 biotin (clone PK136, Biolegend, California), anti-TER119 biotin (TER119), anti-GR1 biotin (clone RB6-8C5), anti-MAC-1 biotin (clone M1-170), anti-B220 biotin (RA3-6B2), anti-TCR $\gamma\delta$  biotin (clone GL3, Biolegend, California), anti-CD5 APC (clone 53-7.3, Biolegend,

California), anti-PD-1 PE (clone 29F.1A12, Biolegend, California) and anti-CTLA4 APC (clone UC10-4B9, Biolegend, California). Second step labeling to detect biotinylated antibodies was performed with streptavidin BV786 or BV711 (Biolegend, California). Intracellular staining was performed with anti-FOXP3 e450 (clone FJK-165, Invitrogen eBioscience, California), anti-active Caspase 3 PE (clone C92-605, BD Pharmingen, California) and anti-human Ki67 FITC (clone MOPC-21, BD Pharmingen) after fixation and permeabilization with eBioscience FOXP3 staining kit.

### ***In vitro* Treg cell suppression assay**

Single cell suspensions of spleen and lymph nodes (pooled axial and brachial) were mashed and filtered. Splenocyte suspensions were incubated with 2 mL red cell removal buffer (RCRB) for 2 min, the cell suspension underlaid with 1 mL of FCS and washed in KDS/BSS medium. Spleen and lymph node cell suspensions were combined and stained with antibody conjugates labeling CD4, CD8, CD25 for 30 min at 4°C and washed. Cells were resuspended with 2.5 µg/mL PI in KDS/BSS medium and then viable CD4<sup>+</sup> conventional T cells or CD4<sup>+</sup> Treg cells were purified using an Aria II FACS sorter (BD Biosciences). Cells were washed in KDS/BSS medium and re-filtered into polypropylene tubes. Conventional T cells were washed with PBS, resuspended in Cell Trace Violet (CTV) solution in 0.1% BSA/PBS at a final concentration of 5 µM for 10 min at 37°C. RPMI complete medium (5 mL) was added to the cells and incubated for 10 min at 4°C to quench the reaction. Cells were then washed at 4°C and resuspended in RPMI complete medium for plating at 1x10<sup>4</sup>/well. Sorted Treg cells were recovered by centrifugation and resuspended in RPMI complete medium with anti-CD3 antibodies (1 µg/mL) and plated at varying cell numbers. Irradiated splenocytes (30 Gy) were used as APCs and plated at 4x10<sup>4</sup>/well in RPMI complete medium. Cells were cultured for 72 h in an incubator set at 37°C with 10% CO<sub>2</sub>-in-air. Flow cytometry was performed on a Fortessa (BD Biosciences). The percentage suppression was calculated as (% divided cells in no Treg well/% divided cells in test well)/% divided cells in no Treg well × 100.
